# Supplementary material
Source: PubMed Central journal article supplement (PMC6775969)
Supplement: 41396_2019_395_MOESM1_ESM.pdf [file 41396_2019_395_MOESM1_ESM.pdf]

**Online Supplementary Information (OSI) for: Ma, Li, & Gotelli**  
“Diversity-Disease Relationships and Shared Species Analyses for the Human Microbiome-Associated Diseases” *The ISME Journal*

**(I) Supplement to “Materials and Methods” (Shared Species Analysis: SSA)—  
Shared Species Analysis Algorithms (A1 and A2)**

**(II) Supplementary Tables**

**Table S1.** Twenty-seven 16S-rRNA metagenomic datasets utilized to analyze diversity-disease relationships (DDRs)

**Table S2.** The *mean* and *standard error* of the Hill numbers (diversity) for each treatment in each of the 27 case studies, as well as the results (*d*-statistic and *p*-value) for the effect-size test of the microbiome-associated disease on diversity (the highlighted cells contain significant effect sizes with *p*-value=0.05)

**Table S3A.** The results from the analysis (using *Algorithm A1*) of shared species between the healthy and diseased samples. Shared OTUs were detected in both healthy and diseased individuals. The expected number of shared OTUs was taken as the average of 1000 simulations from a randomization test in which the pooled set of reads were randomly re-assigned to healthy or diseased status. Among 41 comparisons of the 27 case studies, only 1 case showed no significant changes in the shared species between the healthy and diseased microbiome groups.

**Table S3B.** The results from the analysis (with *A2 algorithm*) of shared species between the healthy and diseased samples. Shared OTUs were detected in both healthy and diseased individuals. The expected number of shared OTUs was taken as the average of 1000 simulations from a randomization test in which the pooled set of *microbiome samples* was randomly re-assigned to healthy or diseased status (*i.e.*, randomly divided into the healthy or diseased group). Among 41 comparisons of the 27 case studies, 21 cases showed no significant differences in the shared species between the healthy and diseased microbiome groups ( $p > 0.05$ ), and 20 cases showed decreased numbers of shared species ( $p < 0.05$ ).

**Table S4.** A summary on the diversity-disease relationships (DDRs) in the 31 case studies cited in the Appendix S1 of Johnson et al (2015) in “Frontiers in research on biodiversity and disease” *Ecology Letters*.

**Fig S1.** A diagram showing the shared species analysis using *Algorithm A1*:

**Fig S2.** A diagram showing the shared species analysis using *Algorithm A2*:

## Supplement to “Materials and Methods”— Shared Species Analysis Algorithms (A1 and A2)

### Data Preparation

Assume there are two treatments: the healthy and diseased, and the healthy treatment contains  $a$  microbiome samples (Table 1) and the diseased treatment contains  $b$  samples (Table 2). Further assume that the total reads (the total abundances) in the healthy treatment is  $A$ , and that in the diseased is  $B$ , as computed in Tables 1 & 2.

**Table 1.** The OTU table of the healthy treatment (group)

| Sample ID          | OTU 1    | OTU 2    | OTU 3    | ... .. | OTU $N$  |
|--------------------|----------|----------|----------|--------|----------|
| Sample 1           | $x_{11}$ | $x_{12}$ | $x_{13}$ | ... .. | $x_{1N}$ |
| Sample 2           | $x_{21}$ | $x_{22}$ | $x_{23}$ | ... .. | $x_{2N}$ |
| Sample 3           | $x_{31}$ | $x_{32}$ | $x_{33}$ | ... .. | $x_{3N}$ |
| ... ..             | ... ..   | ... ..   | ... ..   | ... .. | ... ..   |
| Sample $a$         | $x_{a1}$ | $x_{a2}$ | $x_{a3}$ | ... .. | $x_{aN}$ |
| <b>Column Sum*</b> | $x_{+1}$ | $x_{+2}$ | $x_{+3}$ | ... .. | $x_{+N}$ |

The column sum of OTU  $j$  is  $x_{+j} = \sum_{i=1}^a x_{ij}$ , and the total reads of in the  $a$  samples of the healthy

treatment is  $A = \sum_{i=1}^a \sum_{j=1}^N x_{ij}$ .

**Table 2.** The OTU table of the diseased treatment (group)

| Sample ID          | OTU 1    | OTU 2    | OTU 3    | ... .. | OTU $N$  |
|--------------------|----------|----------|----------|--------|----------|
| Sample 1           | $y_{11}$ | $y_{12}$ | $y_{13}$ | ... .. | $y_{1N}$ |
| Sample 2           | $y_{21}$ | $y_{22}$ | $y_{23}$ | ... .. | $y_{2N}$ |
| Sample 3           | $y_{31}$ | $y_{32}$ | $y_{33}$ | ... .. | $y_{3N}$ |
| ... ..             | ... ..   | ... ..   | ... ..   | ... .. | ... ..   |
| Sample $b$         | $y_{b1}$ | $y_{b2}$ | $y_{b3}$ | ... .. | $y_{bN}$ |
| <b>Column Sum*</b> | $y_{+1}$ | $y_{+2}$ | $y_{+3}$ | ... .. | $y_{+N}$ |

The column sum of OTU  $j$  is  $y_{+j} = \sum_{i=1}^b y_{ij}$ , and the total reads of in the  $a$  samples of the healthy

treatment is  $B = \sum_{i=1}^b \sum_{j=1}^N y_{ij}$

**Algorithm A1:** The Shared Species Analysis through “Random Reassignments” of both OTUs and Samples

**Step (1)** Compute the column sums for the healthy and diseased treatments, respectively, *i.e.*, the total number of population abundances for each species (OTU) in either healthy or diseased treatment.

**Step (2)** Pool together the  $A$  reads (individuals from the healthy treatment) and  $B$  reads (individuals from the diseased treatment), and obtained  $A+B$  reads (individuals) without caring the *identities* (which OTUs, but each OTU still keep track of its name or label) or *sources* (from the healthy or diseased samples). The structure of OTU table is gone at this step, regardless their row or column numbers in the original OTU table.

**Step (3)** Randomly select  $A$  reads for the healthy treatment, and recount the number of reads (individuals) for each kind of OTU (each species). The leftover reads are assigned to the diseased treatment, and similarly, recount the number of reads (individuals) for each kind of OTU (species) in the diseased treatment.

**Step (4)** Repeat Step (3) for 1000 times, and compute the number of shared OTUs between the healthy and diseased for each repetition.

**Step (5)** Compute pseudo- $p$  value as follows:

Let  $D$  be the times when the number of *shared species* from 1000 times of random sampling (*i.e.*, random re-assignments) exceeded the number of *shared species observed*. A pseudo  $p$ -value can be computed as:

$$p = D/1000$$

If  $p$ -value < 0.05, then we conclude that the difference in shared species cannot be attributed to random effect alone, and disease is very likely to have a significant effect on the number of shared species.

Fig S1 below shows the process of random reassignment with an example of only 3 OTUs, 12 & 16 reads (bacterial individuals) from the healthy and diseased treatments, respectively.

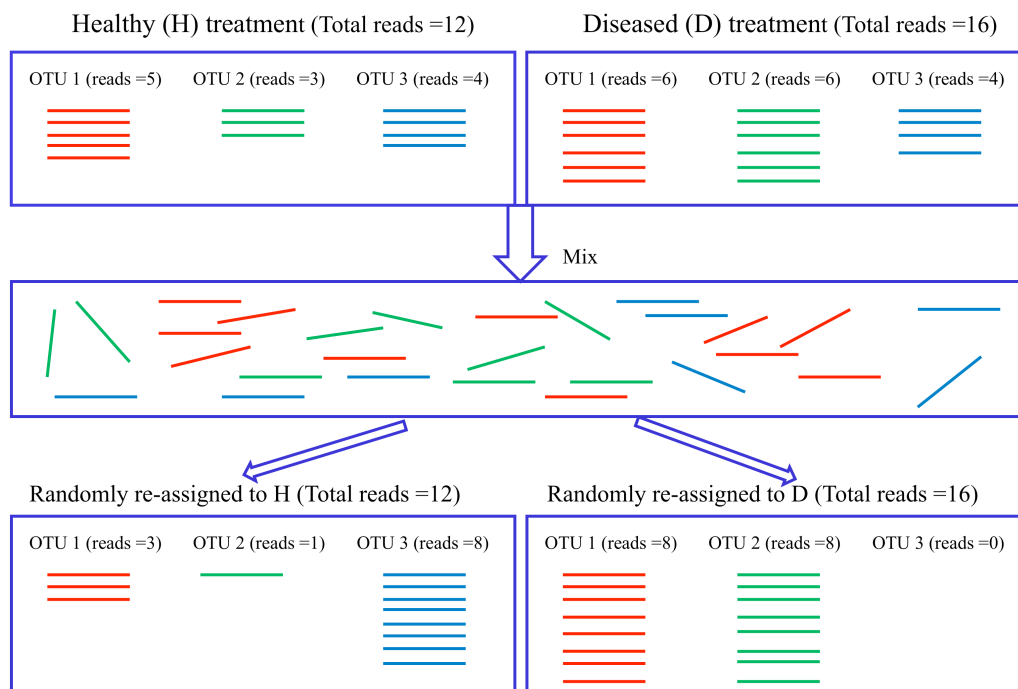

**Fig S1.** A diagram showing the shared species analysis using **Algorithm A1**: 16S-rRNA reads (bacterial individuals) are represented with lines of various colors (different colors for different kinds of species or OTUs); the intermediate box contains mixed reads, without orders but each read keeping track of its identity (OTU number or species name); 3 species or OTUs were assumed, and 12 & 16 reads were assumed in the healthy and diseased treatments, respectively.

**Algorithm A2:** The Shared Species Analysis through “Random Reassignments” of Samples only.

**Step (1)** Pool together all microbiome samples from the healthy and diseased treatments. That is, mix  $a+b$  samples in Tables 1 & 2.

**Step (2)** Randomly select  $a$  samples from the mixed samples as the healthy treatment, and treat the leftover  $b$  samples as the diseased treatment. See Fig S1 below for the process.

**Step (3)** Repeat step (2) 1000 times and compute the shared species number between the healthy and diseased samples for each time of the random sampling.

**Step (4)** Compute pseudo- $p$  value

Let  $D$  be the times when the number of *shared species* from 1000 times of random sampling (*i.e.*, random re-assignments) exceeded the number of *shared species observed*. A pseudo  $p$ -value can be computed as

$$p=D/1000$$

If  $p$ -value $<0.05$ , then we conclude that the difference in shared species cannot be attributed to random effect alone, and hence the decrease of shared species is most likely caused by disease. Instead, if  $p$ -value $>0.05$ , the decreased number of shared species is most likely due to random effect, rather than due to disease.

Fig S2 below shows the process of random reassignment of the samples with an example of only 3 OTUs, 12 & 16 reads (bacterial individuals) from the healthy and diseased treatments, respectively.

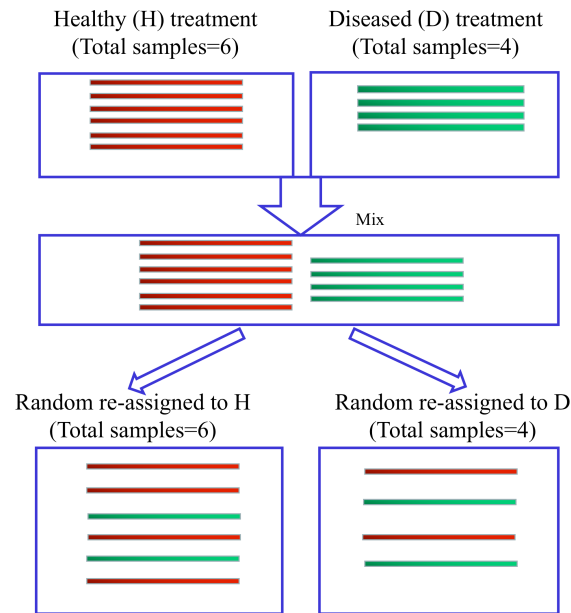

**Fig S2.** A diagram showing the shared species analysis using *Algorithm A2*: the top left and right boxes contain 6 healthy and 4 microbiome samples, respectively. The middle box contains mixed samples of 10 samples, pooled from the healthy (6 samples) and diseased (4 samples) groups. In the bottom, the pooled samples were reassigned randomly to the healthy and diseased groups again, but the samples were randomly mixed here.

**Table S1.** Twenty-seven 16S-rRNA metagenomic datasets utilized to analyze diversity-disease relationships (DDRs)

| Index | Sites | Disease                          | Groups                                                                | References*                                                               |                          |
|-------|-------|----------------------------------|-----------------------------------------------------------------------|---------------------------------------------------------------------------|--------------------------|
| 1     | Gut   | IBD (Inflammatory Bowel Disease) | Crohn's disease (CD) (18), Ulcerative colitis (UC) (38), Healthy (18) | Papa et al (2012)                                                         |                          |
| 2     |       |                                  | CD (251) , UC (324), Healthy (62)                                     | Halfvarson et al (2017)                                                   |                          |
| 3     |       | Obesity                          | Lean (61), Obese (196) and Overweight (24)                            | Turnbaugh et al (2009)                                                    |                          |
| 4     |       | CRC                              | Cancer (46) vs. Healthy (56)                                          | Wang et al (2012)                                                         |                          |
| 5     |       | HIV                              | Non-treatment (7) vs. ART treatment (11)                              | Neff et al (2018)                                                         |                          |
| 6     |       |                                  | WithART(14), WithoutART(12), Healthy (22)                             | Lozupone et al (2013)                                                     |                          |
| 7     |       |                                  | HIV Negative (20) vs. Positive (40)                                   | McHardy et al (2013)                                                      |                          |
| 8     |       | Type 1 diabetes and Obesity      | Normal T1D (33) vs Normal Healthy (33)                                | Kim, Jane                                                                 |                          |
|       |       |                                  | Obesity T1D (24) vs. Obesity Healthy (26)                             |                                                                           |                          |
| 9     |       | Gout                             | Disease (41) vs. Healthy (42)                                         | Guo et al (2015)                                                          |                          |
| 10    |       | MHE                              | MHE (25), Cirrhotic (25), Healthy (25)                                | Zhang et al (2013)                                                        |                          |
| 11    |       | Parkinson's Disease              | Disease (205) vs. Healthy (133)                                       | Hill-Burns et al 2017)                                                    |                          |
| 12    |       | Schizophrenia                    | Disease (25). vs. Healthy (25)                                        | Dilip V. Jeste (UC San Diego)                                             |                          |
| 13    |       | Autism, Neurotypical             | Autism (88), Neurotypical (41), Healthy (14)                          | Kang et al (2017)                                                         |                          |
| 14    |       | Atherosclerosis                  | Disease (15) vs. Healthy (15)                                         | Koren et al (2010)                                                        |                          |
| 15    |       | Oral                             | Atherosclerosis                                                       | Disease (14) vs. Healthy (15)                                             | Koren et al (2010)       |
| 16    |       |                                  | Periodontitis                                                         | PB (22), PnB (22), Healthy (17)                                           | Abusleme et al (2013)    |
|       |       |                                  |                                                                       | Disease (29), Control (29), Healthy (29)                                  | Griffen et al (2012)     |
| 18    |       |                                  | Smoking                                                               | Smoking (6) vs. Non-smoking (9)                                           | Lazarevic et al (2010)   |
| 19    |       |                                  |                                                                       | Smoking (74) vs. Non-smoking (72)                                         | Charlson et al (2010)    |
| 20    |       | Nostril                          | Smoking                                                               | Smoking (74) vs. Non-smoking (71)                                         | Charlson et al (2010)    |
| 21    |       | Skin                             | Psoriasis                                                             | Disease (77), Control (83), Healthy (76)                                  | Alekseyenko et al (2013) |
| 22    |       | Lung                             | Cystic Fibrosis (CF)                                                  | End of Treatment (23) vs. Exacerbation (23)                               | Fodor et al (2012)       |
| 23    |       |                                  |                                                                       | Disease (16) vs. Healthy (10)                                             | Blainey et al 2012)      |
| 24    |       | HIV                              | Disease (82) vs. Healthy (77)                                         | Lozupone et al (2013)                                                     |                          |
| 25    |       | Vaginal                          | Bacterial Vaginosis (BV)                                              | ABV, SBV, Healthy                                                         |                          |
| 26    |       | Semen                            | Infertile                                                             | Abnormal (33), Subnormal (28), Normal (35). Genus level and species level | Weng et al 2014          |
| 27    | Milk  | Mastitis                         | Mastitis (4) vs. Healthy (16)                                         | Urbaniak (2015)                                                           |                          |

**Table S2.** The mean and standard error of the Hill numbers (diversity) for each treatment in each of the 27 case studies, as well as the results (*d*-statistic and *p*-value) for the effect-size test of the microbiome-associated disease on diversity (the highlighted cells contains significant effect sizes with *p*-value=0.05)

| Sites | Diseases                         | Treatments     | Statistics                  | Diversity in Hill Numbers |             |             |             |             | Asymptomatic Estimation |             |             |        |
|-------|----------------------------------|----------------|-----------------------------|---------------------------|-------------|-------------|-------------|-------------|-------------------------|-------------|-------------|--------|
|       |                                  |                |                             | <i>q</i> =0               | <i>q</i> =1 | <i>q</i> =2 | <i>q</i> =3 | <i>q</i> =4 | <i>q</i> =0             | <i>q</i> =1 | <i>q</i> =2 |        |
| Gut   | IBD (Inflammatory Bowel Disease) | 1              | Healthy                     | Mean                      | 170.500     | 34.466      | 16.565      | 12.298      | 10.508                  | 254.768     | 35.988      | 16.651 |
|       |                                  |                |                             | Std. Err.                 | 15.034      | 3.675       | 1.926       | 1.412       | 1.180                   | 24.684      | 3.861       | 1.939  |
|       |                                  |                | CD                          | Mean                      | 157.944     | 32.605      | 15.574      | 11.453      | 9.757                   | 238.684     | 33.956      | 15.652 |
|       |                                  |                |                             | Std. Err.                 | 13.713      | 3.133       | 1.497       | 1.088       | 0.918                   | 20.012      | 3.310       | 1.509  |
|       |                                  |                | UC                          | Mean                      | 102.868     | 19.974      | 10.354      | 7.983       | 6.953                   | 161.313     | 20.735      | 10.409 |
|       |                                  |                |                             | Std. Err.                 | 9.508       | 2.523       | 1.399       | 1.051       | 0.887                   | 14.895      | 2.666       | 1.413  |
|       |                                  | Healthy vs. CD | Cohen's <i>d</i>            | 0.180                     | 0.070       | 0.060       | 0.090       | 0.100       | 0.150                   | 0.070       | 0.060       |        |
|       |                                  |                | <i>p</i> -value of <i>d</i> | 0.590                     | 0.840       | 0.850       | 0.800       | 0.770       | 0.660                   | 0.830       | 0.850       |        |
|       |                                  | Healthy vs. UC | Cohen's <i>d</i>            | 1.120                     | 0.960       | 0.810       | 0.770       | 0.760       | 1.010                   | 0.970       | 0.810       |        |
|       |                                  |                | <i>p</i> -value of <i>d</i> | <0.001                    | <0.001      | 0.010       | 0.010       | 0.010       | <0.001                  | <0.001      | 0.010       |        |

|                        |                             |                             |                             |           |          |        |        |         |          |          |        |        |
|------------------------|-----------------------------|-----------------------------|-----------------------------|-----------|----------|--------|--------|---------|----------|----------|--------|--------|
|                        |                             | 2                           | Healthy                     | Mean      | 1287.081 | 47.145 | 16.518 | 11.224  | 9.269    | 1821.898 | 48.844 | 16.853 |
|                        |                             |                             |                             | Std. Err. | 77.562   | 4.318  | 1.750  | 1.166   | 0.935    | 101.651  | 4.373  | 1.795  |
|                        |                             |                             | CD                          | Mean      | 784.084  | 25.538 | 11.464 | 8.607   | 7.425    | 1168.244 | 28.512 | 12.782 |
|                        |                             |                             |                             | Std. Err. | 28.642   | 1.234  | 0.534  | 0.394   | 0.333    | 38.672   | 1.425  | 0.762  |
|                        |                             |                             | UC                          | Mean      | 1192.549 | 41.229 | 16.658 | 11.957  | 10.078   | 1699.290 | 44.007 | 17.347 |
|                        |                             |                             |                             | Std. Err. | 28.819   | 1.405  | 0.603  | 0.431   | 0.357    | 38.497   | 1.475  | 0.658  |
|                        | Healthy vs. CD              | Cohen's <i>d</i>            | 0.810                       | 0.720     | 0.360    | 0.260  | 0.230  | 0.790   | 0.660    | 0.290    |        |        |
|                        |                             | <i>p</i> -value of <i>d</i> | <0.001                      | <0.001    | 0.010    | 0.070  | 0.110  | <0.001  | <0.001   | 0.040    |        |        |
|                        | Healthy vs. UC              | Cohen's <i>d</i>            | 0.140                       | 0.130     | -0.090   | -0.150 | -0.170 | 0.140   | 0.090    | -0.110   |        |        |
|                        |                             | <i>p</i> -value of <i>d</i> | 0.310                       | 0.360     | 0.540    | 0.280  | 0.210  | 0.330   | 0.520    | 0.440    |        |        |
|                        | Obesity                     | 3                           | Lean                        | Mean      | 263.180  | 64.712 | 26.818 | 17.896  | 14.494   | 398.035  | 70.961 | 27.278 |
|                        |                             |                             |                             | Std. Err. | 12.031   | 2.617  | 1.484  | 1.033   | 0.835    | 16.033   | 2.923  | 1.534  |
|                        |                             |                             | Overweight                  | Mean      | 275.042  | 65.688 | 27.625 | 18.876  | 15.420   | 396.811  | 70.955 | 28.024 |
|                        |                             |                             |                             | Std. Err. | 20.234   | 5.749  | 3.515  | 2.576   | 2.099    | 26.433   | 6.300  | 3.625  |
|                        |                             |                             | Obesity                     | Mean      | 233.163  | 61.409 | 25.711 | 17.446  | 14.273   | 348.373  | 67.514 | 26.202 |
|                        |                             |                             |                             | Std. Err. | 4.887    | 1.711  | 1.007  | 0.739   | 0.613    | 7.324    | 1.910  | 1.042  |
|                        |                             | Lean vs. Overweight         | Cohen's <i>d</i>            | -0.130    | 0.010    | 0.010  | -0.020 | -0.030  | 0.010    | 0.050    | 0.020  |        |
|                        |                             |                             | <i>p</i> -value of <i>d</i> | 0.600     | 0.960    | 0.960  | 0.940  | 0.900   | 0.970    | 0.850    | 0.940  |        |
| Lean vs. Obesity       |                             | Cohen's <i>d</i>            | 0.350                       | 0.200     | 0.140    | 0.110  | 0.090  | 0.430   | 0.190    | 0.140    |        |        |
|                        |                             | <i>p</i> -value of <i>d</i> | 0.020                       | 0.180     | 0.350    | 0.460  | 0.530  | <0.001  | 0.210    | 0.350    |        |        |
| Cancer                 | 4                           | Healthy                     | Mean                        | 167.536   | 39.797   | 15.944 | 11.420 | 9.729   | 301.083  | 46.863   | 16.229 |        |
|                        |                             |                             | Std. Err.                   | 5.886     | 2.226    | 0.988  | 0.713  | 0.606   | 11.174   | 2.764    | 1.023  |        |
|                        |                             | Cancer                      | Mean                        | 136.739   | 29.688   | 12.259 | 8.938  | 7.681   | 220.802  | 33.621   | 12.456 |        |
|                        |                             |                             | Std. Err.                   | 7.064     | 1.794    | 0.852  | 0.615  | 0.519   | 12.416   | 2.083    | 0.880  |        |
|                        |                             | Healthy vs. Cancer          | Cohen's <i>d</i>            | 0.650     | 0.670    | 0.550  | 0.520  | 0.500   | 0.920    | 0.720    | 0.550  |        |
|                        |                             |                             | <i>p</i> -value of <i>d</i> | <0.001    | <0.001   | 0.010  | 0.010  | 0.020   | <0.001   | <0.001   | 0.010  |        |
| HIV                    | 5                           | Negative                    | Mean                        | 781.405   | 58.486   | 22.079 | 15.208 | 12.564  | 1066.929 | 61.936   | 22.436 |        |
|                        |                             |                             | Std. Err.                   | 49.588    | 3.938    | 1.788  | 1.264  | 1.031   | 70.258   | 4.470    | 1.918  |        |
|                        |                             | Treatment                   | Mean                        | 803.700   | 58.707   | 22.488 | 15.597 | 12.972  | 1127.109 | 64.302   | 22.969 |        |
|                        |                             |                             | Std. Err.                   | 72.075    | 3.692    | 1.550  | 1.110  | 0.927   | 92.443   | 4.349    | 1.638  |        |
|                        |                             | Non-treat                   | Mean                        | 621.500   | 50.195   | 19.304 | 13.166 | 10.906  | 898.516  | 57.410   | 19.754 |        |
|                        |                             |                             | Std. Err.                   | 86.129    | 4.663    | 1.780  | 1.196  | 1.000   | 107.597  | 5.857    | 1.855  |        |
|                        |                             | Negative vs. Treatment      | Cohen's <i>d</i>            | 0.020     | -0.060   | -0.100 | -0.110 | -0.120  | -0.070   | -0.140   | -0.110 |        |
|                        |                             |                             | <i>p</i> -value of <i>d</i> | 0.950     | 0.800    | 0.680  | 0.650  | 0.610   | 0.760    | 0.560    | 0.640  |        |
|                        |                             | Negative vs. Non-treat      | Cohen's <i>d</i>            | 0.450     | 0.350    | 0.260  | 0.280  | 0.280   | 0.360    | 0.150    | 0.230  |        |
|                        |                             |                             | <i>p</i> -value of <i>d</i> | 0.120     | 0.220    | 0.360  | 0.320  | 0.320   | 0.210    | 0.590    | 0.410  |        |
|                        | 6                           | Negative                    | Mean                        | 537.318   | 55.688   | 21.581 | 14.699 | 12.030  | 823.936  | 57.413   | 21.617 |        |
|                        |                             |                             | Std. Err.                   | 39.985    | 6.609    | 2.983  | 1.960  | 1.542   | 56.040   | 6.749    | 2.992  |        |
|                        |                             | Treatment                   | Mean                        | 497.643   | 40.657   | 15.383 | 10.828 | 9.129   | 756.213  | 41.461   | 15.396 |        |
|                        |                             |                             | Std. Err.                   | 30.094    | 5.525    | 2.222  | 1.525  | 1.267   | 38.885   | 5.666    | 2.225  |        |
|                        |                             | Non-treat                   | Mean                        | 593.750   | 65.218   | 24.101 | 16.171 | 13.193  | 865.520  | 66.877   | 24.138 |        |
|                        |                             |                             | Std. Err.                   | 43.668    | 6.304    | 2.745  | 1.876  | 1.504   | 58.398   | 6.477    | 2.750  |        |
|                        | Negative vs. Treatment      | Cohen's <i>d</i>            | 0.100                       | 0.520     | 0.490    | 0.460  | 0.430  | 0.130   | 0.560    | 0.490    |        |        |
|                        |                             | <i>p</i> -value of <i>d</i> | 0.780                       | 0.150     | 0.170    | 0.190  | 0.220  | 0.700   | 0.120    | 0.170    |        |        |
| Negative vs. Non-treat | Cohen's <i>d</i>            | -0.390                      | -0.480                      | -0.350    | -0.300   | -0.290 | -0.260 | -0.460  | -0.340   |          |        |        |
|                        | <i>p</i> -value of <i>d</i> | 0.290                       | 0.190                       | 0.350     | 0.410    | 0.420  | 0.480  | 0.210   | 0.350    |          |        |        |
| 7                      | Negative                    | Mean                        | 505.950                     | 28.323    | 12.156   | 9.141  | 7.934  | 740.090 | 28.458   | 12.158   |        |        |
|                        |                             | Std. Err.                   | 20.044                      | 2.491     | 1.207    | 0.890  | 0.756  | 27.086  | 2.507    | 1.208    |        |        |
|                        | Positive                    | Mean                        | 470.150                     | 25.209    | 9.987    | 7.258  | 6.238  | 680.065 | 25.328   | 9.988    |        |        |
|                        |                             | Std. Err.                   | 20.701                      | 2.251     | 0.919    | 0.648  | 0.545  | 30.363  | 2.265    | 0.919    |        |        |
|                        | Negative vs. Positive       | Cohen's <i>d</i>            | 0.390                       | 0.340     | 0.450    | 0.530  | 0.560  | 0.460   | 0.340    | 0.450    |        |        |
|                        |                             | <i>p</i> -value of <i>d</i> | 0.170                       | 0.220     | 0.110    | 0.060  | 0.050  | 0.100   | 0.220    | 0.110    |        |        |
| T1D (Lean)             | 8                           | Normal-Healthy              | Mean                        | 727.727   | 42.460   | 16.695 | 11.635 | 9.663   | 952.367  | 42.934   | 16.763 |        |
|                        |                             |                             | Std. Err.                   | 41.991    | 3.979    | 1.698  | 1.148  | 0.927   | 53.431   | 3.952    | 1.686  |        |
|                        |                             | Normal-T1D                  | Mean                        | 677.813   | 34.823   | 13.128 | 9.230  | 7.766   | 883.228  | 35.047   | 13.141 |        |
|                        |                             |                             | Std. Err.                   | 42.337    | 3.644    | 1.393  | 0.924  | 0.740   | 52.103   | 3.666    | 1.391  |        |
|                        |                             | Healthy vs. T1D             | Cohen's <i>d</i>            | 0.140     | 0.340    | 0.380  | 0.380  | 0.370   | 0.160    | 0.360    | 0.390  |        |
|                        |                             |                             | <i>p</i> -value of <i>d</i> | 0.570     | 0.180    | 0.140  | 0.140  | 0.140   | 0.530    | 0.150    | 0.130  |        |
|                        | T1D (Obesity)               | Obesity-Healthy             | Mean                        | 864.231   | 41.114   | 14.488 | 9.846  | 8.151   | 1114.182 | 41.467   | 14.826 |        |
|                        |                             |                             | Std. Err.                   | 46.008    | 3.806    | 1.542  | 1.000  | 0.770   | 56.133   | 3.768    | 1.506  |        |
|                        |                             | Obesity-T1D                 | Mean                        | 723.417   | 42.751   | 14.462 | 9.671  | 8.015   | 926.518  | 43.185   | 14.503 |        |
|                        |                             |                             | Std. Err.                   | 67.435    | 3.746    | 1.372  | 0.929  | 0.766   | 84.563   | 3.745    | 1.362  |        |

|      |                     |               |                 |                             |                             |                             |         |        |        |         |         |         |        |        |
|------|---------------------|---------------|-----------------|-----------------------------|-----------------------------|-----------------------------|---------|--------|--------|---------|---------|---------|--------|--------|
|      |                     |               | Healthy vs. T1D | Cohen's <i>d</i>            | 0.440                       | -0.070                      | <0.001  | 0.040  | 0.040  | 0.460   | -0.070  | 0.050   |        |        |
|      |                     |               |                 | <i>p</i> -value of <i>d</i> | 0.130                       | 0.800                       | 0.990   | 0.900  | 0.890  | 0.120   | 0.810   | 0.870   |        |        |
|      | Gout                | 9             | Healthy         | Mean                        | 234.333                     | 26.818                      | 11.044  | 8.155  | 7.027  | 386.201 | 27.948  | 11.070  |        |        |
|      |                     |               |                 |                             | Std. Err.                   | 12.645                      | 2.547   | 1.099  | 0.801  | 0.674   | 24.881  | 2.724   | 1.104  |        |
|      |                     |               |                 | Gout                        | Mean                        | 169.756                     | 18.354  | 8.109  | 6.152  | 5.376   | 267.979 | 18.979  | 8.127  |        |
|      |                     |               |                 |                             | Std. Err.                   | 13.676                      | 2.293   | 1.029  | 0.748  | 0.628   | 25.657  | 2.437   | 1.034  |        |
|      |                     |               |                 | Healthy vs. Gout            | Cohen's <i>d</i>            | 0.830                       | 0.600   | 0.490  | 0.460  | 0.450   | 0.830   | 0.600   | 0.490  |        |
|      |                     |               |                 |                             | <i>p</i> -value of <i>d</i> | <0.001                      | 0.010   | 0.030  | 0.040  | 0.050   | <0.001  | 0.010   | 0.030  |        |
|      | MHE                 | 10            | Healthy         | Mean                        | 129.640                     | 42.776                      | 20.762  | 14.828 | 12.378 | 231.301 | 54.554  | 22.702  |        |        |
|      |                     |               |                 |                             | Std. Err.                   | 15.118                      | 5.811   | 3.449  | 2.572  | 2.148   | 25.222  | 7.662   | 4.008  |        |
|      |                     |               |                 | Control                     | Mean                        | 132.640                     | 30.219  | 15.086 | 11.086 | 9.445   | 220.050 | 36.409  | 15.955 |        |
|      |                     |               |                 |                             | Std. Err.                   | 17.914                      | 5.569   | 2.942  | 2.082  | 1.735   | 26.756  | 6.848   | 3.160  |        |
|      |                     |               |                 | MHE                         | Mean                        | 118.750                     | 33.493  | 15.665 | 11.044 | 9.232   | 229.645 | 43.693  | 16.914 |        |
|      |                     |               |                 |                             | Std. Err.                   | 10.567                      | 4.290   | 2.378  | 1.666  | 1.367   | 16.152  | 6.139   | 2.705  |        |
|      |                     |               |                 | Healthy vs. MHE             | Cohen's <i>d</i>            | 0.030                       | 0.280   | 0.290  | 0.300  | 0.300   | -0.140  | 0.220   | 0.270  |        |
|      |                     |               |                 |                             | <i>p</i> -value of <i>d</i> | 0.910                       | 0.340   | 0.310  | 0.300  | 0.300   | 0.630   | 0.440   | 0.360  |        |
|      |                     |               |                 | Control vs. MHE             | Cohen's <i>d</i>            | 0.100                       | -0.200  | -0.100 | -0.050 | -0.020  | -0.210  | -0.270  | -0.110 |        |
|      |                     |               |                 |                             | <i>p</i> -value of <i>d</i> | 0.730                       | 0.500   | 0.740  | 0.870  | 0.940   | 0.470   | 0.350   | 0.700  |        |
|      | Parkinson's Disease | 11            | Healthy         | Mean                        | 164.902                     | 25.405                      | 11.968  | 8.943  | 7.718  | 173.584 | 25.683  | 11.988  |        |        |
|      |                     |               |                 |                             | Std. Err.                   | 5.493                       | 1.300   | 0.678  | 0.502  | 0.422   | 5.910   | 1.322   | 0.680  |        |
|      |                     |               |                 | PD                          | Mean                        | 176.585                     | 26.604  | 12.211 | 9.031  | 7.752   | 186.844 | 26.909  | 12.250 |        |
|      |                     |               |                 |                             | Std. Err.                   | 4.599                       | 0.982   | 0.464  | 0.332  | 0.276   | 4.996   | 0.997   | 0.464  |        |
|      |                     |               |                 | Healthy vs. PD              | Cohen's <i>d</i>            | -0.160                      | -0.100  | -0.060 | -0.050 | -0.040  | -0.170  | -0.100  | -0.070 |        |
|      |                     |               |                 |                             | <i>p</i> -value of <i>d</i> | 0.150                       | 0.390   | 0.570  | 0.640  | 0.690   | 0.130   | 0.390   | 0.540  |        |
|      | Schizophrenia       | 12            | Healthy         | Mean                        | 596.880                     | 40.556                      | 15.654  | 11.016 | 9.230  | 894.326 | 41.228  | 15.666  |        |        |
|      |                     |               |                 |                             | Std. Err.                   | 38.207                      | 4.958   | 2.411  | 1.653  | 1.320   | 52.770  | 5.063   | 2.415  |        |
|      |                     |               |                 | Disease                     | Mean                        | 541.120                     | 38.376  | 15.385 | 11.038 | 9.375   | 814.625 | 39.092  | 15.398 |        |
|      |                     |               |                 |                             | Std. Err.                   | 38.692                      | 3.756   | 1.456  | 1.001  | 0.829   | 54.200  | 3.851   | 1.458  |        |
|      |                     |               |                 | Healthy vs. Disease         | Cohen's <i>d</i>            | 0.310                       | 0.100   | -0.030 | -0.070 | -0.100  | 0.310   | 0.100   | -0.030 |        |
|      |                     |               |                 |                             | <i>p</i> -value of <i>d</i> | 0.290                       | 0.730   | 0.910  | 0.790  | 0.730   | 0.270   | 0.740   | 0.910  |        |
|      | Autism              | 13            | Healthy         | Mean                        | 136.214                     | 26.156                      | 14.318  | 11.083 | 9.574  | 143.062 | 26.341  | 14.343  |        |        |
|      |                     |               |                 |                             | Std. Err.                   | 14.561                      | 4.641   | 2.882  | 2.253  | 1.924   | 15.549  | 4.688   | 2.891  |        |
|      |                     |               |                 | Autism                      | Mean                        | 149.636                     | 23.278  | 11.165 | 8.300  | 7.120   | 157.472 | 23.451  | 11.178 |        |
|      |                     |               |                 |                             | Std. Err.                   | 5.743                       | 1.474   | 0.799  | 0.593  | 0.500   | 6.074   | 1.487   | 0.800  |        |
|      |                     |               |                 | Neurotypical                | Mean                        | 137.195                     | 20.067  | 9.973  | 7.564  | 6.562   | 143.577 | 20.193  | 9.985  |        |
|      |                     |               |                 |                             | Std. Err.                   | 8.734                       | 2.131   | 1.129  | 0.828  | 0.696   | 9.386   | 2.151   | 1.132  |        |
|      |                     |               |                 | Healthy vs. Autism          | Cohen's <i>d</i>            | -0.220                      | 0.130   | 0.260  | 0.300  | 0.310   | -0.220  | 0.130   | 0.260  |        |
|      |                     |               |                 |                             | <i>p</i> -value of <i>d</i> | 0.450                       | 0.660   | 0.360  | 0.300  | 0.280   | 0.440   | 0.660   | 0.360  |        |
|      |                     |               |                 | Healthy vs. Neurotypical    | Cohen's <i>d</i>            | -0.040                      | 0.330   | 0.410  | 0.430  | 0.430   | -0.020  | 0.330   | 0.410  |        |
|      |                     |               |                 |                             | <i>p</i> -value of <i>d</i> | 0.910                       | 0.290   | 0.190  | 0.180  | 0.170   | 0.940   | 0.290   | 0.190  |        |
|      | Atherosclerosis     | 14            | Healthy         | Mean                        | 444.867                     | 136.258                     | 54.655  | 35.802 | 28.722 | 708.177 | 156.960 | 55.957  |        |        |
|      |                     |               |                 |                             | Std. Err.                   | 16.999                      | 9.687   | 5.784  | 4.109  | 3.357   | 33.355  | 11.699  | 6.024  |        |
|      |                     |               |                 | Disease                     | Mean                        | 470.667                     | 133.827 | 55.620 | 37.023 | 29.622  | 748.447 | 152.671 | 56.824 |        |
|      |                     |               |                 |                             | Std. Err.                   | 27.925                      | 16.161  | 7.921  | 5.368  | 4.295   | 41.267  | 19.003  | 8.188  |        |
|      |                     |               |                 | Healthy vs. Disease         | Cohen's <i>d</i>            | -0.220                      | 0.160   | 0.050  | 0.010  | 0.010   | -0.230  | 0.180   | 0.060  |        |
|      |                     |               |                 |                             | <i>p</i> -value of <i>d</i> | 0.550                       | 0.670   | 0.880  | 0.980  | 0.980   | 0.530   | 0.620   | 0.870  |        |
| Oral | Atherosclerosis     | 15            | Healthy         | Mean                        | 157.733                     | 26.011                      | 11.594  | 8.563  | 7.358  | 224.580 | 27.120  | 11.671  |        |        |
|      |                     |               |                 |                             | Std. Err.                   | 11.002                      | 5.180   | 2.698  | 1.967  | 1.638   | 14.737  | 5.500   | 2.736  |        |
|      |                     |               |                 |                             | Disease                     | Mean                        | 215.286 | 37.642 | 13.867 | 9.331   | 7.730   | 283.238 | 38.931 | 13.914 |
|      |                     |               |                 |                             |                             | Std. Err.                   | 17.402  | 5.203  | 2.201  | 1.455   | 1.165   | 23.660  | 5.415  | 2.213  |
|      |                     |               |                 |                             | Healthy vs. Disease         | Cohen's <i>d</i>            | -0.970  | -0.600 | -0.320 | -0.210  | -0.160  | -0.720  | -0.590 | -0.320 |
|      |                     |               |                 |                             |                             | <i>p</i> -value of <i>d</i> | 0.020   | 0.130  | 0.390  | 0.590   | 0.680   | 0.070   | 0.130  | 0.400  |
|      |                     | Periodontitis | 16              | Healthy                     | Mean                        | 70.000                      | 12.022  | 6.251  | 4.941  | 4.407   | 104.304 | 12.745  | 6.320  |        |
|      |                     |               |                 |                             |                             | Std. Err.                   | 6.215   | 2.522  | 1.333  | 1.018   | 0.883   | 8.190   | 2.807  | 1.367  |
|      |                     |               |                 |                             | PB                          | Mean                        | 108.682 | 27.190 | 13.207 | 9.701   | 8.279   | 152.325 | 28.901 | 13.381 |
|      |                     |               |                 |                             |                             | Std. Err.                   | 6.128   | 3.258  | 1.784  | 1.303   | 1.085   | 8.572   | 3.567  | 1.831  |
|      |                     |               |                 |                             | PnB                         | Mean                        | 102.773 | 27.319 | 14.842 | 11.454  | 9.953   | 145.003 | 29.057 | 15.080 |
|      |                     |               |                 |                             |                             | Std. Err.                   | 6.452   | 3.099  | 1.855  | 1.459   | 1.268   | 7.623   | 3.389  | 1.908  |
|      |                     |               |                 |                             | Healthy vs. PB              | Cohen's <i>d</i>            | -1.440  | -1.240 | -1.050 | -0.980  | -0.950  | -1.300  | -1.210 | -1.050 |
|      |                     |               |                 |                             |                             | <i>p</i> -value of <i>d</i> | <0.001  | <0.001 | <0.001 | 0.010   | 0.010   | <0.001  | <0.001 | <0.001 |
|      |                     |               |                 |                             | Healthy vs. PnB             | Cohen's <i>d</i>            | -1.160  | -1.180 | -1.160 | -1.140  | -1.130  | -1.160  | -1.160 | -1.160 |
|      |                     |               |                 |                             |                             | <i>p</i> -value of <i>d</i> | <0.001  | <0.001 | <0.001 | <0.001  | <0.001  | <0.001  | <0.001 | <0.001 |

|                          |                             |                             |                             |                             |           |           |        |         |         |          |         |        |        |       |
|--------------------------|-----------------------------|-----------------------------|-----------------------------|-----------------------------|-----------|-----------|--------|---------|---------|----------|---------|--------|--------|-------|
|                          |                             | 17                          | Healthy                     | Mean                        | 141.138   | 65.735    | 38.716 | 29.025  | 24.608  | 143.151  | 67.048  | 39.194 |        |       |
|                          |                             |                             |                             | Std. Err.                   | 5.889     | 4.394     | 3.397  | 2.765   | 2.397   | 6.076    | 4.530   | 3.485  |        |       |
|                          |                             |                             | Control                     | Mean                        | 169.552   | 80.297    | 44.597 | 31.590  | 25.941  | 172.792  | 81.861  | 45.096 |        |       |
|                          |                             |                             |                             | Std. Err.                   | 6.442     | 4.121     | 3.052  | 2.522   | 2.202   | 6.764    | 4.242   | 3.117  |        |       |
|                          |                             |                             | Disease                     | Mean                        | 182.966   | 93.665    | 53.861 | 38.480  | 31.535  | 186.536  | 95.821  | 54.663 |        |       |
|                          |                             |                             |                             | Std. Err.                   | 5.114     | 3.660     | 3.398  | 2.933   | 2.557   | 5.108    | 3.817   | 3.514  |        |       |
|                          |                             | Healthy vs. Disease         | Cohen's <i>d</i>            | -1.400                      | -1.310    | -0.880    | -0.660 | -0.560  | -1.430  | -1.310   | -0.880  |        |        |       |
|                          |                             |                             | <i>p</i> -value of <i>d</i> | <0.001                      | <0.001    | <0.001    | 0.020  | 0.040   | <0.001  | <0.001   | <0.001  |        |        |       |
|                          |                             | Control vs. Disease         | Cohen's <i>d</i>            | -0.450                      | -0.650    | -0.540    | -0.470 | -0.440  | -0.450  | -0.650   | -0.540  |        |        |       |
|                          |                             |                             | <i>p</i> -value of <i>d</i> | 0.100                       | 0.020     | 0.050     | 0.080  | 0.100   | 0.090   | 0.020    | 0.050   |        |        |       |
|                          |                             | Smoking                     | 18                          | Non-Smoker                  | Mean      | 297.333   | 59.616 | 21.197  | 14.462  | 12.059   | 941.822 | 74.033 | 21.517 |       |
|                          |                             |                             |                             |                             | Std. Err. | 33.182    | 5.049  | 2.524   | 2.095   | 1.895    | 144.906 | 6.450  | 2.608  |       |
|                          | Smoker                      |                             |                             | Mean                        | 331.333   | 55.189    | 18.756 | 12.240  | 9.967   | 1173.781 | 67.595  | 18.914 |        |       |
|                          |                             |                             |                             | Std. Err.                   | 94.503    | 12.538    | 3.751  | 2.203   | 1.731   | 435.874  | 15.113  | 3.770  |        |       |
|                          | Non-Smoker vs. Smoker       |                             |                             | Cohen's <i>d</i>            | -0.090    | 0.280     | 0.330  | 0.390   | 0.420   | -0.160   | 0.310   | 0.350  |        |       |
|                          |                             |                             |                             | <i>p</i> -value of <i>d</i> | 0.870     | 0.600     | 0.540  | 0.480   | 0.440   | 0.760    | 0.570   | 0.530  |        |       |
|                          | 19                          |                             | Non-Smoker                  | Mean                        | 107.056   | 11.231    | 4.582  | 3.580   | 3.213   | 211.813  | 12.238  | 4.602  |        |       |
|                          |                             |                             |                             | Std. Err.                   | 5.597     | 0.920     | 0.290  | 0.206   | 0.177   | 12.297   | 1.084   | 0.294  |        |       |
|                          |                             |                             | Smoker                      | Mean                        | 126.392   | 17.742    | 7.431  | 5.605   | 4.905   | 266.912  | 19.809  | 7.498  |        |       |
|                          |                             |                             |                             | Std. Err.                   | 7.618     | 1.539     | 0.730  | 0.530   | 0.446   | 16.274   | 1.740   | 0.751  |        |       |
|                          |                             |                             | Non-Smoker vs. Smoker       | Cohen's <i>d</i>            | -0.300    | -0.650    | -0.630 | -0.620  | -0.610  | -0.400   | -0.660  | -0.600 |        |       |
|                          |                             |                             |                             | <i>p</i> -value of <i>d</i> | 0.080     | <0.001    | <0.001 | <0.001  | <0.001  | 0.020    | <0.001  | <0.001 |        |       |
|                          | 20                          | Non-Smoker                  | Mean                        | 126.181                     | 34.011    | 16.869    | 12.544 | 10.753  | 197.698 | 36.732   | 17.172  |        |        |       |
|                          |                             |                             | Std. Err.                   | 4.463                       | 1.371     | 0.875     | 0.709  | 0.625   | 7.920   | 1.510    | 0.910   |        |        |       |
| Smoker                   |                             | Mean                        | 116.425                     | 32.783                      | 17.362    | 13.165    | 11.325 | 188.087 | 36.057  | 18.067   |         |        |        |       |
|                          |                             | Std. Err.                   | 5.306                       | 1.819                       | 0.928     | 0.711     | 0.616  | 9.238   | 2.126   | 1.030    |         |        |        |       |
| Non-Smoker vs. Smoker    |                             | Cohen's <i>d</i>            | 0.260                       | 0.150                       | -0.040    | -0.090    | -0.100 | 0.160   | 0.120   | -0.080   |         |        |        |       |
|                          |                             | <i>p</i> -value of <i>d</i> | 0.120                       | 0.360                       | 0.810     | 0.570     | 0.530  | 0.340   | 0.490   | 0.650    |         |        |        |       |
| Skin                     | Psoriasis                   | 21                          | Control                     | Mean                        | 137.494   | 43.405    | 18.610 | 12.909  | 10.744  | 140.617  | 46.295  | 19.083 |        |       |
|                          |                             |                             |                             | Std. Err.                   | 6.249     | 2.019     | 0.986  | 0.703   | 0.579   | 6.460    | 2.196   | 1.039  |        |       |
|                          |                             |                             | Normal                      | Mean                        | 132.605   | 49.481    | 23.484 | 16.360  | 13.540  | 135.638  | 53.347  | 24.508 |        |       |
|                          |                             |                             |                             | Std. Err.                   | 6.232     | 2.821     | 1.642  | 1.200   | 1.002   | 6.446    | 3.114   | 1.793  |        |       |
|                          |                             |                             | Lesion                      | Mean                        | 128.234   | 45.083    | 20.387 | 13.999  | 11.528  | 131.221  | 48.462  | 21.167 |        |       |
|                          |                             |                             |                             | Std. Err.                   | 5.991     | 2.760     | 1.630  | 1.178   | 0.970   | 6.194    | 3.026   | 1.746  |        |       |
|                          |                             | Control vs. Lesion          | Cohen's <i>d</i>            | 0.170                       | -0.020    | -0.050    | -0.030 | -0.020  | 0.170   | -0.030   | -0.070  |        |        |       |
|                          |                             |                             | <i>p</i> -value of <i>d</i> | 0.290                       | 0.900     | 0.730     | 0.830  | 0.900   | 0.300   | 0.840    | 0.670   |        |        |       |
|                          |                             | Normal vs. Lesion           | Cohen's <i>d</i>            | 0.080                       | 0.180     | 0.240     | 0.260  | 0.270   | 0.080   | 0.180    | 0.240   |        |        |       |
|                          |                             |                             | <i>p</i> -value of <i>d</i> | 0.620                       | 0.260     | 0.140     | 0.110  | 0.100   | 0.620   | 0.260    | 0.140   |        |        |       |
|                          |                             | Lung                        | Cystic Fibrosis (CF)        | 22                          | Treated   | Mean      | 29.720 | 3.735   | 2.296   | 1.984    | 1.854   | 37.689 | 3.758  | 2.297 |
|                          |                             |                             |                             |                             |           | Std. Err. | 3.231  | 0.561   | 0.316   | 0.246    | 0.213   | 3.851  | 0.566  | 0.317 |
| Exacerbation             | Mean                        |                             |                             |                             | 40.440    | 4.652     | 2.630  | 2.214   | 2.051   | 52.211   | 4.688   | 2.632  |        |       |
|                          | Std. Err.                   |                             |                             |                             | 3.909     | 0.929     | 0.498  | 0.380   | 0.331   | 4.936    | 0.938   | 0.500  |        |       |
| Treated vs. Exacerbation | Cohen's <i>d</i>            |                             |                             |                             | -0.600    | -0.210    | -0.130 | -0.120  | -0.110  | -0.650   | -0.210  | -0.130 |        |       |
|                          | <i>p</i> -value of <i>d</i> |                             |                             |                             | 0.040     | 0.470     | 0.650  | 0.690   | 0.690   | 0.030    | 0.460   | 0.650  |        |       |
| 23                       | Healthy                     |                             |                             | Mean                        | 60.667    | 25.856    | 15.640 | 12.295  | 10.781  | 61.794   | 27.019  | 16.284 |        |       |
|                          |                             |                             |                             | Std. Err.                   | 7.587     | 2.331     | 1.544  | 1.266   | 1.109   | 7.641    | 2.392   | 1.724  |        |       |
|                          | Disease                     |                             |                             | Mean                        | 42.750    | 15.526    | 10.649 | 8.872   | 7.958   | 43.725   | 15.681  | 10.707 |        |       |
|                          |                             |                             |                             | Std. Err.                   | 3.790     | 1.755     | 1.300  | 1.103   | 0.996   | 3.843    | 1.778   | 1.309  |        |       |
|                          | Healthy vs. Disease         |                             |                             | Cohen's <i>d</i>            | 0.870     | 1.530     | 1.090  | 0.920   | 0.870   | 0.880    | 1.630   | 1.130  |        |       |
|                          |                             |                             |                             | <i>p</i> -value of <i>d</i> | 0.060     | <0.001    | 0.020  | 0.050   | 0.060   | 0.060    | <0.001  | 0.020  |        |       |
| 24                       | HIV                         | Negative                    | Mean                        | 251.194                     | 34.640    | 17.540    | 13.170 | 11.243  | 401.789 | 36.891   | 19.145  |        |        |       |
|                          |                             |                             | Std. Err.                   | 20.905                      | 3.757     | 1.884     | 1.363  | 1.124   | 31.370  | 4.076    | 2.485   |        |        |       |
|                          |                             | Positive                    | Mean                        | 262.756                     | 34.337    | 15.975    | 11.471 | 9.644   | 404.129 | 35.522   | 16.077  |        |        |       |
|                          |                             |                             | Std. Err.                   | 24.697                      | 4.493     | 1.948     | 1.297  | 1.038   | 37.058  | 4.718    | 1.959   |        |        |       |
|                          |                             | Negative vs. Positive       | Cohen's <i>d</i>            | -0.060                      | 0.060     | 0.140     | 0.190  | 0.220   | 0.010   | 0.090    | 0.190   |        |        |       |
|                          |                             |                             | <i>p</i> -value of <i>d</i> | 0.760                       | 0.770     | 0.470     | 0.320  | 0.270   | 0.960   | 0.660    | 0.330   |        |        |       |
| Vaginal                  | BV                          | 25                          | Healthy                     | Mean                        | 7.544     | 1.709     | 1.415  | 1.344   | 1.313   | 9.704    | 1.715   | 1.415  |        |       |
|                          |                             |                             |                             | Std. Err.                   | 0.613     | 0.082     | 0.051  | 0.043   | 0.040   | 0.926    | 0.083   | 0.051  |        |       |
|                          |                             |                             | BV                          | Mean                        | 21.701    | 6.736     | 4.637  | 3.966   | 3.646   | 27.650   | 6.800   | 4.651  |        |       |
|                          |                             |                             |                             | Std. Err.                   | 0.680     | 0.292     | 0.214  | 0.183   | 0.166   | 1.110    | 0.295   | 0.215  |        |       |
|                          |                             |                             | Healthy vs. BV              | Cohen's <i>d</i>            | -2.230    | -2.520    | -2.240 | -2.120  | -2.070  | -1.900   | -2.520  | -2.230 |        |       |
|                          |                             |                             |                             | <i>p</i> -value of <i>d</i> | <0.001    | <0.001    | <0.001 | <0.001  | <0.001  | <0.001   | <0.001  | <0.001 |        |       |



|                        |                             |                             |                             |                             |           |         |        |        |        |         |         |        |       |
|------------------------|-----------------------------|-----------------------------|-----------------------------|-----------------------------|-----------|---------|--------|--------|--------|---------|---------|--------|-------|
| Semen                  | Infertile<br>(Genus level)  | 26                          | Normal                      | Mean                        | 129.286   | 20.648  | 9.233  | 6.834  | 5.901  | 153.896 | 21.042  | 9.262  |       |
|                        |                             |                             |                             | Std. Err.                   | 5.522     | 1.431   | 0.771  | 0.570  | 0.484  | 6.182   | 1.475   | 0.777  |       |
|                        |                             |                             | Subnormal                   | Mean                        | 136.821   | 22.644  | 9.733  | 6.970  | 5.933  | 157.600 | 23.071  | 9.766  |       |
|                        |                             |                             |                             | Std. Err.                   | 6.138     | 1.752   | 0.895  | 0.608  | 0.495  | 6.027   | 1.815   | 0.903  |       |
|                        |                             |                             | Abnormal                    | Mean                        | 138.182   | 23.609  | 11.138 | 8.192  | 7.014  | 171.071 | 24.077  | 11.177 |       |
|                        |                             |                             |                             | Std. Err.                   | 7.070     | 1.830   | 0.977  | 0.711  | 0.598  | 7.891   | 1.881   | 0.985  |       |
|                        | Normal vs.<br>Subnormal     |                             | Cohen's <i>d</i>            | -0.240                      | -0.230    | -0.100  | -0.050 | -0.020 | -0.130 | -0.220  | -0.100  |        |       |
|                        |                             |                             | <i>p</i> -value of <i>d</i> | 0.350                       | 0.370     | 0.690   | 0.860  | 0.940  | 0.620  | 0.380   | 0.690   |        |       |
|                        | Normal vs.<br>Abnormal      |                             | Cohen's <i>d</i>            | -0.220                      | -0.280    | -0.340  | -0.330 | -0.330 | -0.400 | -0.280  | -0.330  |        |       |
|                        |                             |                             | <i>p</i> -value of <i>d</i> | 0.370                       | 0.260     | 0.170   | 0.180  | 0.190  | 0.110  | 0.260   | 0.180   |        |       |
|                        | Infertile Species<br>level) |                             | Normal                      | Mean                        | 525.771   | 87.557  | 27.113 | 16.723 | 13.185 | 764.343 | 96.505  | 27.444 |       |
|                        |                             |                             |                             | Std. Err.                   | 37.004    | 10.194  | 3.674  | 2.136  | 1.593  | 52.841  | 11.706  | 3.756  |       |
|                        |                             |                             | Subnormal                   | Mean                        | 580.500   | 97.792  | 32.950 | 21.037 | 16.749 | 828.139 | 107.539 | 33.519 |       |
|                        |                             |                             |                             | Std. Err.                   | 48.263    | 14.207  | 5.808  | 3.510  | 2.657  | 65.145  | 16.160  | 5.962  |       |
|                        |                             |                             | Abnormal                    | Mean                        | 604.515   | 103.857 | 35.913 | 22.741 | 17.925 | 865.191 | 114.174 | 36.547 |       |
|                        |                             |                             |                             | Std. Err.                   | 55.264    | 14.777  | 5.899  | 3.667  | 2.780  | 73.190  | 16.648  | 6.068  |       |
|                        |                             |                             | Normal vs.<br>Subnormal     | Cohen's <i>d</i>            | -0.230    | -0.150  | -0.180 | -0.220 | -0.240 | -0.200  | -0.140  | -0.180 |       |
|                        |                             |                             |                             | <i>p</i> -value of <i>d</i> | 0.380     | 0.550   | 0.490  | 0.400  | 0.350  | 0.440   | 0.570   | 0.490  |       |
| Normal vs.<br>Abnormal |                             | Cohen's <i>d</i>            | -0.240                      | -0.190                      | -0.280    | -0.320  | -0.330 | -0.240 | -0.180 | -0.280  |         |        |       |
|                        |                             | <i>p</i> -value of <i>d</i> | 0.320                       | 0.430                       | 0.260     | 0.200   | 0.180  | 0.320  | 0.460  | 0.250   |         |        |       |
| Milk                   |                             | Mastitis                    | 27                          | Healthy                     | Mean      | 85.688  | 10.923 | 5.450  | 4.305  | 3.852   | 94.066  | 10.941 | 5.451 |
|                        |                             |                             |                             |                             | Std. Err. | 1.477   | 1.143  | 0.608  | 0.475  | 0.419   | 2.641   | 1.146  | 0.609 |
|                        | Mastitis                    |                             |                             | Mean                        | 83.750    | 9.693   | 4.482  | 3.599  | 3.280  | 89.751  | 9.715   | 4.484  |       |
|                        |                             |                             |                             | Std. Err.                   | 4.230     | 2.134   | 1.054  | 0.796  | 0.706  | 4.489   | 2.144   | 1.055  |       |
|                        | Healthy vs.<br>Mastitis     |                             |                             | Cohen's <i>d</i>            | 0.250     | 0.240   | 0.390  | 0.370  | 0.340  | 0.460   | 0.240   | 0.390  |       |
|                        |                             |                             |                             | <i>p</i> -value of <i>d</i> | 0.660     | 0.670   | 0.490  | 0.510  | 0.550  | 0.430   | 0.670   | 0.490  |       |

**Table S3A.** The results from the analysis (with *AI algorithm*) of shared species between the healthy and diseased samples. Shared OTUs were detected in both healthy and diseased individuals. The expected number of shared OTUs was taken as the average of 1000 simulations from a randomization test in which the pooled set of reads were randomly re-assigned to healthy or diseased status. Among 41 comparisons of the 27 case studies, only 1 case showed no significant changes in the shared species between the healthy and diseased microbiome groups.

| Microbiome          | Disease                          | Index   | Healthy          | Diseased        | Observed Shared OTUs | Expected Shared OTUs | <i>p</i> -value |
|---------------------|----------------------------------|---------|------------------|-----------------|----------------------|----------------------|-----------------|
| Gut                 | IBD (Inflammatory Bowel Disease) | 1       | Healthy          | CD              | 597                  | 792.734              | < 0.01          |
|                     |                                  |         | Healthy          | UC              | 627                  | 919.766              | < 0.01          |
|                     |                                  | 2       | Healthy          | CD              | 5368                 | 6417.533             | < 0.01          |
|                     |                                  |         | Healthy          | UC              | 5869                 | 6446.158             | < 0.01          |
|                     | Obesity                          | 3       | Lean             | Overweight      | 1172                 | 1387.208             | < 0.01          |
|                     |                                  |         | Lean             | Obesity         | 1498                 | 1714.379             | < 0.01          |
|                     | Cancer                           | 4       | Healthy          | Cancer          | 2190                 | 3970.857             | < 0.01          |
|                     | HIV                              | 5       | Negative         | Treatment       | 3253                 | 3771.407             | < 0.01          |
|                     |                                  |         | Negative         | Non-treatment   | 2681                 | 3319.944             | < 0.01          |
|                     |                                  | 6       | Negative         | Treatment       | 1678                 | 2293.157             | < 0.01          |
|                     |                                  |         | Negative         | Non-treatment   | 1593                 | 2338.103             | < 0.01          |
|                     |                                  | 7       | Negative         | Positive        | 1857                 | 2320.653             | < 0.01          |
|                     | T1D (Lean)                       | 8       | Healthy          | T1D             | 2423                 | 2840.267             | < 0.01          |
|                     | T1D (Obesity)                    |         | Healthy          | T1D             | 2340                 | 2764.854             | < 0.01          |
| Gout                | 9                                | Healthy | Gout             | 1139            | 1723.811             | < 0.01               |                 |
| MHE                 | 10                               | Healthy | MHE              | 676             | 929.581              | < 0.01               |                 |
|                     |                                  | Control | MHE              | 730             | 946.121              | < 0.01               |                 |
| Parkinson's Disease | 11                               | Healthy | PD               | 2029            | 6818.997             | < 0.01               |                 |
| Schizophrenia       | 12                               | Healthy | Schizophrenia    | 2308            | 2898.745             | < 0.01               |                 |
| Autism              | 13                               | Healthy | Autism           | 489             | 1612.343             | < 0.01               |                 |
|                     |                                  | Healthy | Neurotypical     | 446             | 1111.665             | < 0.01               |                 |
| Atherosclerosis     | 14                               | Healthy | Atherosclerosis  | 1796            | 2279.417             | < 0.01               |                 |
| Oral                | Atherosclerosis                  | 15      | Healthy          | Atherosclerosis | 524                  | 672.700              | < 0.01          |
|                     | Periodontitis                    | 16      | Healthy          | PB              | 273                  | 494.961              | < 0.01          |
|                     |                                  |         | Healthy          | PnB             | 268                  | 483.720              | < 0.01          |
|                     |                                  | 17      | Healthy          | Disease         | 1223                 | 6002.413             | < 0.01          |
|                     |                                  |         | Control          | Disease         | 0                    | 7018.481             | < 0.01          |
|                     | Smoking                          | 18      | Non-smoking      | Smoking         | 252                  | 600.084              | < 0.01          |
| 19                  |                                  |         | Non-smoking      | Smoking         | 946                  | 1169.389             | < 0.01          |
| 20                  |                                  |         | Non-smoking      | Smoking         | 682                  | 841.023              | < 0.01          |
| Skin                | Psoriasis                        | 21      | Control          | Lesion          | 2072                 | 3089.354             | < 0.01          |
|                     |                                  |         | Normal           | Lesion          | 2274                 | 3090.757             | < 0.01          |
| Lung                | Cystic Fibrosis (CF)             | 22      | End of Treatment | Exacerbation    | 132                  | 156.941              | < 0.01          |
|                     |                                  |         | Healthy          | CF              | 137                  | 214.216              | < 0.01          |
|                     | HIV                              | 24      | Negative         | Positive        | 1876                 | 2330.410             | < 0.01          |
| Vaginal             | BV                               | 25      | Healthy          | BV              | 110                  | 107.984              | 0.97            |
| Semen               | Infertile (Genus level)          | 26      | Normal           | Subnormal       | 379                  | 455.336              | < 0.01          |
|                     |                                  |         | Normal           | Abnormal        | 398                  | 457.451              | < 0.01          |
|                     | Infertile Species level)         |         | Normal           | Subnormal       | 3029                 | 3724.597             | < 0.01          |
|                     |                                  |         | Normal           | Abnormal        | 3165                 | 3910.306             | < 0.01          |
| Milk                | Mastitis                         | 27      | Healthy          | Mastitis        | 107                  | 111.859              | < 0.01          |

**Table S3B.** The results from the analysis (with *A2 algorithm*) of shared species between the healthy and diseased samples. Shared OTUs were detected in both healthy and diseased individuals. The expected number of shared OTUs was taken as the average of 1000 simulations from a randomization test in which the pooled set of *microbiome samples* was randomly re-assigned to healthy or diseased status (*i.e.*, randomly divided into the healthy or diseased group). Among 41 comparisons of the 27 case studies, 21 cases showed no significant differences in the shared species between the healthy and diseased microbiome groups ( $p>0.05$ ), and 20 cases showed decreased numbers of shared species ( $p<0.05$ ).

| Microbiome          | Disease                          | Case #      | Healthy          | Diseased        | Observed Shared OTUs | Reads randomization  |                 | Samples randomization |                 |
|---------------------|----------------------------------|-------------|------------------|-----------------|----------------------|----------------------|-----------------|-----------------------|-----------------|
|                     |                                  |             |                  |                 |                      | Expected Shared OTUs | <i>p</i> -value | Expected Shared OTUs  | <i>p</i> -value |
| Gut                 | IBD (Inflammatory Bowel Disease) | 1           | Healthy          | CD              | 597                  | 792.734              | < 0.01          | 614.419               | 0.085           |
|                     |                                  |             | Healthy          | UC              | 627                  | 919.766              | < 0.01          | 676.986               | 0.063           |
|                     |                                  | 2           | Healthy          | CD              | 5368                 | 6417.533             | < 0.01          | 5597.138              | 0.073           |
|                     |                                  |             | Healthy          | UC              | 5869                 | 6446.158             | < 0.01          | 6138.878              | 0.011           |
|                     | Obesity                          | 3           | Lean             | Overweight      | 1172                 | 1387.208             | < 0.01          | 1216.361              | 0.1             |
|                     |                                  |             | Lean             | Obesity         | 1498                 | 1714.379             | < 0.01          | 1518.899              | 0.244           |
|                     | Cancer                           | 4           | Healthy          | Cancer          | 2190                 | 3970.857             | < 0.01          | 2338.181              | <0.001          |
|                     | HIV                              | 5           | Negative         | Treatment       | 3253                 | 3771.407             | < 0.01          | 3350.387              | 0.033           |
|                     |                                  |             | Negative         | Non-treatment   | 2681                 | 3319.944             | < 0.01          | 2892.884              | 0.016           |
|                     |                                  | 6           | Negative         | Treatment       | 1678                 | 2293.157             | < 0.01          | 1875                  | <0.001          |
|                     |                                  |             | Negative         | Non-treatment   | 1593                 | 2338.103             | < 0.01          | 1881.04               | <0.001          |
|                     |                                  | 7           | Negative         | Positive        | 1857                 | 2320.653             | < 0.01          | 1847.563              | 0.547           |
|                     | T1D (Lean)                       | 8           | Healthy          | T1D             | 2423                 | 2840.267             | < 0.01          | 2422.456              | 0.499           |
|                     | T1D (Obesity)                    |             | Healthy          | T1D             | 2340                 | 2764.854             | < 0.01          | 2353.185              | 0.267           |
|                     | Gout                             | 9           | Healthy          | Gout            | 1139                 | 1723.811             | < 0.01          | 1250.023              | 0.002           |
|                     | MHE                              | 10          | Healthy          | MHE             | 676                  | 929.581              | < 0.01          | 735.756               | 0.002           |
| Control             |                                  |             | MHE              | 730             | 946.121              | < 0.01               | 752.483         | 0.122                 |                 |
| Parkinson's Disease | 11                               | Healthy     | PD               | 2029            | 6818.997             | < 0.01               | 2062.102        | 0.109                 |                 |
| Schizophrenia       | 12                               | Healthy     | Schizophrenia    | 2308            | 2898.745             | < 0.01               | 2381.662        | 0.012                 |                 |
| Autism              | 13                               | Healthy     | Autism           | 489             | 1612.343             | < 0.01               | 544.127         | 0.134                 |                 |
|                     |                                  | Healthy     | Neurotypical     | 446             | 1111.665             | < 0.01               | 554.003         | 0.022                 |                 |
| Atherosclerosis     | 14                               | Healthy     | Atherosclerosis  | 1796            | 2279.417             | < 0.01               | 1799.076        | 0.408                 |                 |
| Oral                | Atherosclerosis                  | 15          | Healthy          | Atherosclerosis | 524                  | 672.700              | < 0.01          | 552.981               | 0.006           |
|                     | Periodontitis                    | 16          | Healthy          | PB              | 273                  | 494.961              | < 0.01          | 382.138               | <0.001          |
|                     |                                  |             | Healthy          | PnB             | 268                  | 483.720              | < 0.01          | 373.133               | <0.001          |
|                     |                                  | 17          | Healthy          | Disease         | 1223                 | 6002.413             | < 0.01          | 1412.453              | 0.088           |
|                     |                                  |             | Control          | Disease         | 0                    | 7018.481             | < 0.01          | 1438.043              | <0.001          |
|                     | Smoking                          | 18          | Non-smoking      | Smoking         | 252                  | 600.084              | < 0.01          | 396.148               | <0.001          |
|                     |                                  | 19          | Non-smoking      | Smoking         | 946                  | 1169.389             | < 0.01          | 1060.256              | <0.001          |
| 20                  |                                  | Non-smoking | Smoking          | 682             | 841.023              | < 0.01               | 733.883         | 0.001                 |                 |
| Skin                | Psoriasis                        | 21          | Control          | Lesion          | 2072                 | 3089.354             | < 0.01          | 2167.521              | 0.001           |
|                     |                                  | Normal      | Lesion           | 2274            | 3090.757             | < 0.01               | 2182.458        | 0.992                 |                 |
| Lung                | Cystic Fibrosis (CF)             | 22          | End Treatment of | Exacerbation    | 132                  | 156.941              | < 0.01          | 138.15                | 0.046           |
|                     |                                  | 23          | Healthy          | CF              | 137                  | 214.216              | < 0.01          | 158.231               | 0.042           |
|                     | HIV                              | 24          | Negative         | Positive        | 1876                 | 2330.410             | < 0.01          | 1891.658              | 0.243           |
| Vaginal             | BV                               | 25          | Healthy          | BV              | 110                  | 107.984              | 0.97            | 104.087               | 0.985           |
| Semen               | Infertile (Genus level)          | 26          | Normal           | Subnormal       | 379                  | 455.336              | < 0.01          | 378.834               | 0.525           |
|                     |                                  |             | Normal           | Abnormal        | 398                  | 457.451              | < 0.01          | 394.929               | 0.706           |
|                     | Normal                           |             | Subnormal        | 3029            | 3724.597             | < 0.01               | 2941.005        | 0.915                 |                 |
|                     | Normal                           |             | Abnormal         | 3165            | 3910.306             | < 0.01               | 3165.035        | 0.466                 |                 |
| Milk                | Mastitis                         | 27          | Healthy          | Mastitis        | 107                  | 111.859              | < 0.01          | 106.558               | 0.61            |

Percentage of cases with lowered shared species = 20/41=49%

## \*References cited in Table S1-S3

- [1] Papa E, Docktor M, Smillie C, et al. 2012. Non-Invasive Mapping of the Gastrointestinal Microbiota Identifies Children with Inflammatory Bowel Disease. *Plos One*, 7(6):e39242.
- [2] Halfvarson J, Brislawn CJ, Lamendella R, et al. 2017. Dynamics of the human gut microbiome in Inflammatory Bowel Disease. *Nature Microbiology*, 2:17004.
- [3] Turnbaugh PJ, Hamady M, Yatsunencko T, et al. 2009. A core gut microbiome in obese and lean twins. *Nature*, 457(7228):480.
- [4] Wang T, Cai G, Qiu Y, et al. 2012. Structural segregation of gut microbiota between colorectal cancer patients and healthy volunteers. *The ISME Journal*, 6(2):320-329.
- [5] Neff CP, Krueger O, Xiong K, et al. 2018. Fecal Microbiota Composition Drives Immune Activation in HIV-infected Individuals. *Ebiomedicine*, 30.
- [6] Lozupone C, Cota-Gomez A, Palmer B E, et al. 2013. Widespread colonization of the lung by *Tropheryma whipplei* in HIV infection. *American Journal of Respiratory & Critical Care Medicine*, 187(10):1110-1117.
- [7] Mchardy IH, Li X, Tong M, et al. 2013. HIV Infection is associated with compositional and functional shifts in the rectal mucosal microbiota. *Microbiome*, 1(1):26.
- [8] <https://clinicaltrials.gov/ct2/show/NCT02938806>
- [9] Guo Z, Zhang J, Wang Z, et al. 2016. Intestinal Microbiota Distinguish Gout Patients from Healthy Humans. *Sci Rep*, 6:20602.
- [10] Zhang Z, Zhai H, Geng J, et al. 2013. Large-scale survey of gut microbiota associated with MHE Via 16S rRNA-based pyrosequencing. *American Journal of Gastroenterology*, 108(10):1601-1611.
- [11] Hill-Burns EM, Debelius JW, Morton JT et al. 2017. Parkinson's Disease and PD Medications Have Distinct Signatures of the Gut Microbiome. *Movement Disorders Official Journal of the Movement Disorder Society*, 32(5):739.
- [12] <https://profiles.ucsd.edu/dilip.jeste>
- [13] Kang DW, Adams JB, Gregory AC, et al. 2017. Microbiota Transfer Therapy alters gut ecosystem and improves gastrointestinal and autism symptoms: an open-label study. *Microbiome*, 5(1):10.
- [14] Koren O, Klaenhammer TR. 2011. Human oral, gut, and plaque microbiota in patients with atherosclerosis. *PNAS*, 108(Suppl 1):4592-4598.
- [15] Koren O, Klaenhammer TR. 2011. Human oral, gut, and plaque microbiota in patients with atherosclerosis. *PNAS*, 108(Suppl 1):4592-4598.
- [16] Abusleme L, Dupuy AK, Dutzan N, et al. 2013. The subgingival microbiome in health and periodontitis and its relationship with community biomass and inflammation. *The ISME Journal*, 7(5):1016-1025.
- [17] Griffen AL, Beall CJ, Campbell JH, et al. 2012. Distinct and complex bacterial profiles in human periodontitis and health revealed by 16S pyrosequencing. *The ISME Journal*, 6(6):1176.

- [18] Lazarevic V, Whiteson K, Hernandez D, et al. 2010. Study of inter- and intra-individual variations in the salivary microbiota. *BMC Genomics*, 11(1):1-11.
- [19] Charlson ES, Chen J, Custersallen R, et al. 2010. Disordered microbial communities in the upper respiratory tract of cigarette smokers. *Plos One*, 5(12):e15216.
- [20] Charlson ES, Chen J, Custersallen R, et al. 2010. Disordered microbial communities in the upper respiratory tract of cigarette smokers. *Plos One*, 5(12):e15216.
- [21] Alekseyenko AV, Perezperez GI, Souza AD, et al. 2013. Community differentiation of the cutaneous microbiota in psoriasis. *Microbiome*, 1,1(2013-12-23), 1(1):31-31.
- [22] Fodor AA, Klem ER, Gilpin DF, et al. 2012. The Adult Cystic Fibrosis Airway Microbiota Is Stable over Time and Infection Type, and Highly Resilient to Antibiotic Treatment of Exacerbations. *Plos One*, 7(9):e45001.
- [23] Blainey PC, Milla CE, Cornfield DN, et al. 2012. Quantitative analysis of the human airway microbial ecology reveals a pervasive signature for cystic fibrosis. *Science Translational Medicine*, 4(153):153ra130.
- [24] Lozupone C, Cota-Gomez A, Palmer B E, et al. 2013. Widespread colonization of the lung by *Tropheryma whipplei* in HIV infection. *American Journal of Respiratory & Critical Care Medicine*, 187(10):1110-1117.
- [25] Srinivasan S, Hoffman NG, Morgan MT, et al. 2012. Bacterial Communities in Women with Bacterial Vaginosis: High Resolution Phylogenetic Analyses Reveal Relationships of Microbiota to Clinical Criteria. *Plos One*, 7(6):e37818.
- [26] Weng SL, Chiu CM, Lin FM, et al. 2014. Bacterial Communities in Semen from Men of Infertile Couples: Metagenomic Sequencing Reveals Relationships of Seminal Microbiota to Semen Quality. *Plos One*, 9(10):e110152.
- [27] Urbaniak C, Mcmillan A, Angelini M, et al. 2014. Effect of chemotherapy on the microbiota and metabolome of human milk, a case report. *Microbiome*, 2(1):24.

**Table S4.** A summary on the diversity-disease relationships (DDRs) in the 31 case studies cited in the Appendix S1 of Johnson et al (2015) in “Frontiers in research on biodiversity and disease” *Ecology Letters*. From 82 cases in Johnson et al.’s (2015), we filtered out the *non-human* or *non-microbiome* diseases, and only keep 31 cases of human microbiome associated diseases.

| Case #                                  | Disease                                                                 | DDR Pattern                            | References**                                            |
|-----------------------------------------|-------------------------------------------------------------------------|----------------------------------------|---------------------------------------------------------|
| [1]                                     | Cystic Fibrosis (CF)                                                    | Species Richness [≈]                   | Fodor. et al (2012) <i>PLoS ONE</i>                     |
| [2]                                     | Cystic Fibrosis (CF)                                                    | Shannon Index [-]                      | Blainey. et al (2012) <i>Sci. Transl. Med</i>           |
| [3]                                     | Chronic Rhinosinusitis                                                  | Shannon Index [-]                      | Abreu. et al (2012) <i>Sci. Transl. Med</i>             |
| [4]                                     | Cystic Fibrosis (CF)                                                    | Shannon Index [-]                      | Filkins. et al (2012) <i>J. Bacteriol</i>               |
| [5]                                     | Acute Otitis Media Pathogens                                            | Shannon Index [-]                      | Pettigrew et al (2012) <i>Appl. Environ. Microbiol.</i> |
| [6]                                     | Cystic Fibrosis (CF)                                                    | Shannon Index [-]                      | Zhao et al (2012) <i>PNAS</i>                           |
| [7]                                     | Cystic Fibrosis (CF)                                                    | Shannon Index<br>Species Richness [-]  | Delhaes et al (2012) <i>PLoS ONE</i>                    |
| [8]                                     | Chronic obstructive pulmonary disease                                   | Shannon Index<br>Species Richness [-]  | Zakharkina et al (2013) <i>PLoS ONE</i>                 |
| [9]                                     | Obstructive pulmonary disease                                           | Shannon Index<br>Simpson Index [-]     | Pragman et al (2012) <i>PLoS ONE</i>                    |
| [10]                                    | Wheezing                                                                | Shannon Index [≈]                      | Cardenas et al (2012) <i>PLoS ONE</i>                   |
| [11]                                    | Cystic Fibrosis (CF)                                                    | Species Richness [-]                   | Stressmann et al (2012) <i>Thorax</i>                   |
| [12]                                    | Pulmonary tuberculosis                                                  | Shannon Index [+]                      | Cui et al (2012) <i>BMC Microbiol.</i>                  |
| [13]                                    | Periodontitis                                                           | Shannon Index<br>Simpson Index [-]     | Junemann et al (2012) <i>PLoS ONE</i>                   |
| [14]                                    | Periodontitis                                                           | Shannon Index [+]                      | Liu et al (2012) <i>PLoS ONE</i>                        |
| [15]                                    | Dental caries, Periodontitis                                            | Shannon Index [-]                      | Ahmed et al (2012) <i>Afr. J. Microbiol. Res.</i>       |
| [16]                                    | Candida (fungal) Infection                                              | Shannon Index<br>Simpson Index [-]     | Kraneveldet al (2012) <i>PLoS ONE</i>                   |
| [17]                                    | Endodontic infection                                                    | Shannon Index<br>Simpson Index [-]     | Hsiao et al (2012) <i>BMC Genomics</i>                  |
| [18]                                    | Dental caries                                                           | Shannon Index [-]                      | Gross et al. (2012) <i>PLoS ONE</i>                     |
| [19]                                    | Periodontal disease, NORA (new-onset rheumatoid arthritis)              | Shannon Index [≈]                      | Scher et al (2012) <i>Arthritis Rheum</i>               |
| [20]                                    | Atopic dermatitis (AD)                                                  | Shannon Index [-]                      | Kong et al (2012) <i>Genome Res.</i>                    |
| [21]                                    | Allergy                                                                 | Species Richness [-]                   | Hanski et al (2012) <i>PNAS</i>                         |
| [22]                                    | Eczema (Dermatitis)                                                     | Shannon Index [-]                      | Ismail et al (2012) <i>Pediat. Allerg. Immu.</i>        |
| [23]                                    | Atopic eczema                                                           | Shannon Index [-]                      | Abrahamsson et al (2012) <i>J. Allergy Clin. Immun</i>  |
| [24]                                    | IC (Interstitial Cystitis) or PBS (Painful Bladder Syndrome)            | Shannon, Richness, Simpson [-]         | Siddiqui et al (2012) <i>BMC Microbiol</i>              |
| [25]                                    | Human Papilloma Virus (HPV)                                             | Species Richness [+]                   | Lee et al (2013) <i>PLoS ONE</i>                        |
| [26]                                    | Vulvovaginal candidiasis (VVC)                                          | Shannon Index,<br>Species Richness [+] | Liu et al (2013) <i>PLoS ONE</i>                        |
| [27]                                    | Colorectal Cancer (CRC)                                                 | Shannon Index [-]                      | Ahn et al (2013) <i>JNCI</i>                            |
| [28]                                    | Inflammatory bowel disease (IBD)                                        | Shannon Index [-]                      | Andoh et al (2012) <i>J. Gastroenterol</i>              |
| [29]                                    | Colorectal Adenoma                                                      | Shannon Index,<br>Species Richness [≈] | Sanapareddy et al. (2012) <i>ISMEJ</i>                  |
| [30]                                    | Recurrent Clostridium Difficile Infection (RCDI)                        | Shannon Index [-]                      | Song et al (2013) <i>PLoS One</i>                       |
| [31]                                    | Clostridium difficile infection (CDI) & CD-negative nosocomial diarrhea | Shannon Index,<br>Species Richness [-] | Antharam et al. (2013) <i>J. Clin. Microbiol</i>        |
| Diversity decreased in diseased samples |                                                                         | 74% (23 out of 31)                     |                                                         |
| Diversity increased in diseased samples |                                                                         | 13% (4 out of 31)                      |                                                         |
| No changes in diseased samples          |                                                                         | 13% (4 out of 31)                      |                                                         |

## \*\* References cited in Table S4

- [1] Junemann, S. *et al.* (2012) Bacterial community shift in treated periodontitis patients revealed by ion torrent 16S rRNA gene amplicon sequencing. *PLoS ONE* 7, e41606. DOI:10.1371/journal.pone.0041606
- [2] Liu, B. *et al.* (2012) Deep sequencing of the oral microbiome reveals signatures of periodontal disease. *PLoS ONE* 7, e37919. DOI: 10.1371/journal.pone.0037919
- [3] Fodor, A.A. *et al.* (2012) The adult cystic fibrosis airway microbiota is stable over time and infection type, and highly resilient to antibiotic treatment of exacerbations. *PLoS ONE* 7, e45001. DOI: 10.1371/journal.pone.0045001
- [4]. Blainey, P.C. *et al.* (2012) Quantitative analysis of the human airway microbial ecology reveals a pervasive signature for cystic fibrosis. *Sci. Transl. Med.* 4, 153ra130. DOI: 10.1126/scitranslmed.3004458
- [5]. Siddiqui, H. *et al.* (2012) Alterations of microbiota in urine from women with interstitial cystitis. *Bmc Microbiol.* 12, 205. DOI: 10.1186/1471-2180-12-205
- [6]. Abreu, N.A. *et al.* (2012) Sinus microbiome diversity depletion and *Corynebacterium tuberculostearicum* enrichment mediates rhinosinusitis. *Sci. Transl. Med.* 4, 151ra124. DOI: 10.1126/scitranslmed.3003783
- [7]. Filkins, L.M. *et al.* (2012) Prevalence of streptococci and increased polymicrobial diversity associated with cystic fibrosis patient stability. *J. Bacteriol.* 194, 4709-4717
- [8]. Pettigrew, M.M. *et al.* (2012) Upper respiratory tract microbial communities, acute otitis media pathogens, and antibiotic use in healthy and sick children. *Appl. Environ. Microb.* 78, 6262-6270
- [9]. Kong, H.D.H. *et al.* (2012) Temporal shifts in the skin microbiome associated with disease flares and treatment in children with atopic dermatitis. *Genome Res.* 22, 850-859
- [10]. Zhao, J.C. *et al.* (2012) Decade-long bacterial community dynamics in cystic fibrosis airways. *P. Natl. Acad. Sci. USA* 109, 5809-5814
- [11]. Delhaes, L. *et al.* (2012) The airway microbiota in cystic fibrosis: a complex fungal and bacterial community-implications for therapeutic management. *PLoS ONE* 7, e36313. DOI: 10.1371/journal.pone.0036313
- [12]. Ahmed, A. *et al.* (2012) Microbial profiling of dental caries and periodontitis patients using denaturing gradient gel electrophoresis. *Afr. J. Microbiol. Res.* 6, 2559-2566
- [13]. Lee, J.E. *et al.* (2013) Association of the vaginal microbiota with human papillomavirus infection in a Korean twin cohort. *PLoS ONE* 8, e63514. DOI: 10.1371/journal.pone.0063514
- [14]. Hanski, I. *et al.* (2012) Environmental biodiversity, human microbiota, and allergy are interrelated. *P. Natl. Acad. Sci. USA* 109, 8334-8339
- [15]. Liu, M.B. *et al.* (2013) Diverse vaginal microbiomes in reproductive-age women with vulvovaginal candidiasis. *PLoS ONE* 8, e79812. DOI: 10.1371/journal.pone.0079812
- [16]. Zakharkina, T. *et al.* (2013) Analysis of the airway microbiota of healthy individuals and patients with chronic obstructive pulmonary disease by T-RFLP and clone sequencing. *PLoS ONE* 8, e68302. DOI: 10.1371/journal.pone.0068302
- [17]. Kraneveld, E.A. *et al.* (2012) The relation between oral *Candida* load and bacterial microbiome profiles in Dutch older adults. *PLoS ONE* 7, e42770. DOI: 10.1371/journal.pone.0042770
- [18]. Hsiao, W.W.L. *et al.* (2012) Microbial transformation from normal oral microbiota to acute endodontic infections. *Bmc Genomics* 13, 345. DOI: 10.1186/1471-2164-13-345
- [19]. Ismail, I.H. *et al.* (2012) Reduced gut microbial diversity in early life is associated with later development of eczema but not atopy in high-risk infants. *Pediat. Allerg. Imm-Uk.* 23, 674-681

- [20]. Gross, E.L. *et al.* (2012) Beyond *Streptococcus mutans*: dental caries onset linked to multiple species by 16S rRNA community analysis. *PLoS ONE* 7, e47722. DOI: 10.1371/journal.pone.0047722
- [21]. Pragman, A.A. *et al.* (2012) The lung microbiome in moderate and severe chronic obstructive pulmonary disease. *PLoS ONE* 7, e47305. DOI: 10.1371/journal.pone.0047305
- [22]. Cardenas, P.A. *et al.* (2012) Upper airways microbiota in antibiotic-naive wheezing and healthy infants from the tropics of rural Ecuador. *PLoS ONE* 7, e46803. DOI: 10.1371/journal.pone.0046803
- [23]. Scher, J.U. *et al.* (2012) Periodontal disease and the oral microbiota in new-onset rheumatoid arthritis. *Arthritis Rheum-U.S.* 64, 3083-3094
- [24]. Stressmann, F.A. *et al.* (2012) Long-term cultivation-independent microbial diversity analysis demonstrates that bacterial communities infecting the adult cystic fibrosis lung show stability and resilience. *Thorax* 67, 867-873
- [25]. Abrahamsson, T.R. *et al.* (2012) Low diversity of the gut microbiota in infants with atopic eczema. *J. Allergy Clin. Immun.* 129, 434-U244
- [26]. Cui, Z.L. *et al.* (2012) Complex sputum microbial composition in patients with pulmonary tuberculosis. *Bmc Microbiol.* 12, 276. DOI: 10.1186/1471-2180-12-276
- [27]. Ahn, J. *et al.* (2013) Human gut microbiome and risk for colorectal cancer. *Jnci-J. Natl. Cancer I.* 105, 1907-1911
- [28]. Andoh, A., *et al.* (2012) Multicenter analysis of fecal microbiota profiles in Japanese patients with Crohn's disease. *J. Gastroenterol.* 47, 1298-1307
- [29]. Sanapareddy, N. *et al.* (2012) Increased rectal microbial richness is associated with the presence of colorectal adenomas in humans. *Isme J.* 6, 1858-1868
- [30]. Song, Y. *et al.* (2013) Microbiota dynamics in patients treated with fecal microbiota transplantation for recurrent *Clostridium difficile* infection. *PLoS ONE* 8, e81330. DOI: 10.1371/journal.pone.0081330
- [31]. Antharam, V.C. *et al.* (2013) Intestinal dysbiosis and depletion of butyrogenic bacteria in *Clostridium difficile* infection and nosocomial diarrhea. *J. Clin. Microbiol.* 51, 2884-2892
